# Supplementary material
Source: PubMed Central journal article supplement (PMC2577237)
Supplement: pp.108.129478_2.pdf [file pp.108.129478_2.pdf]

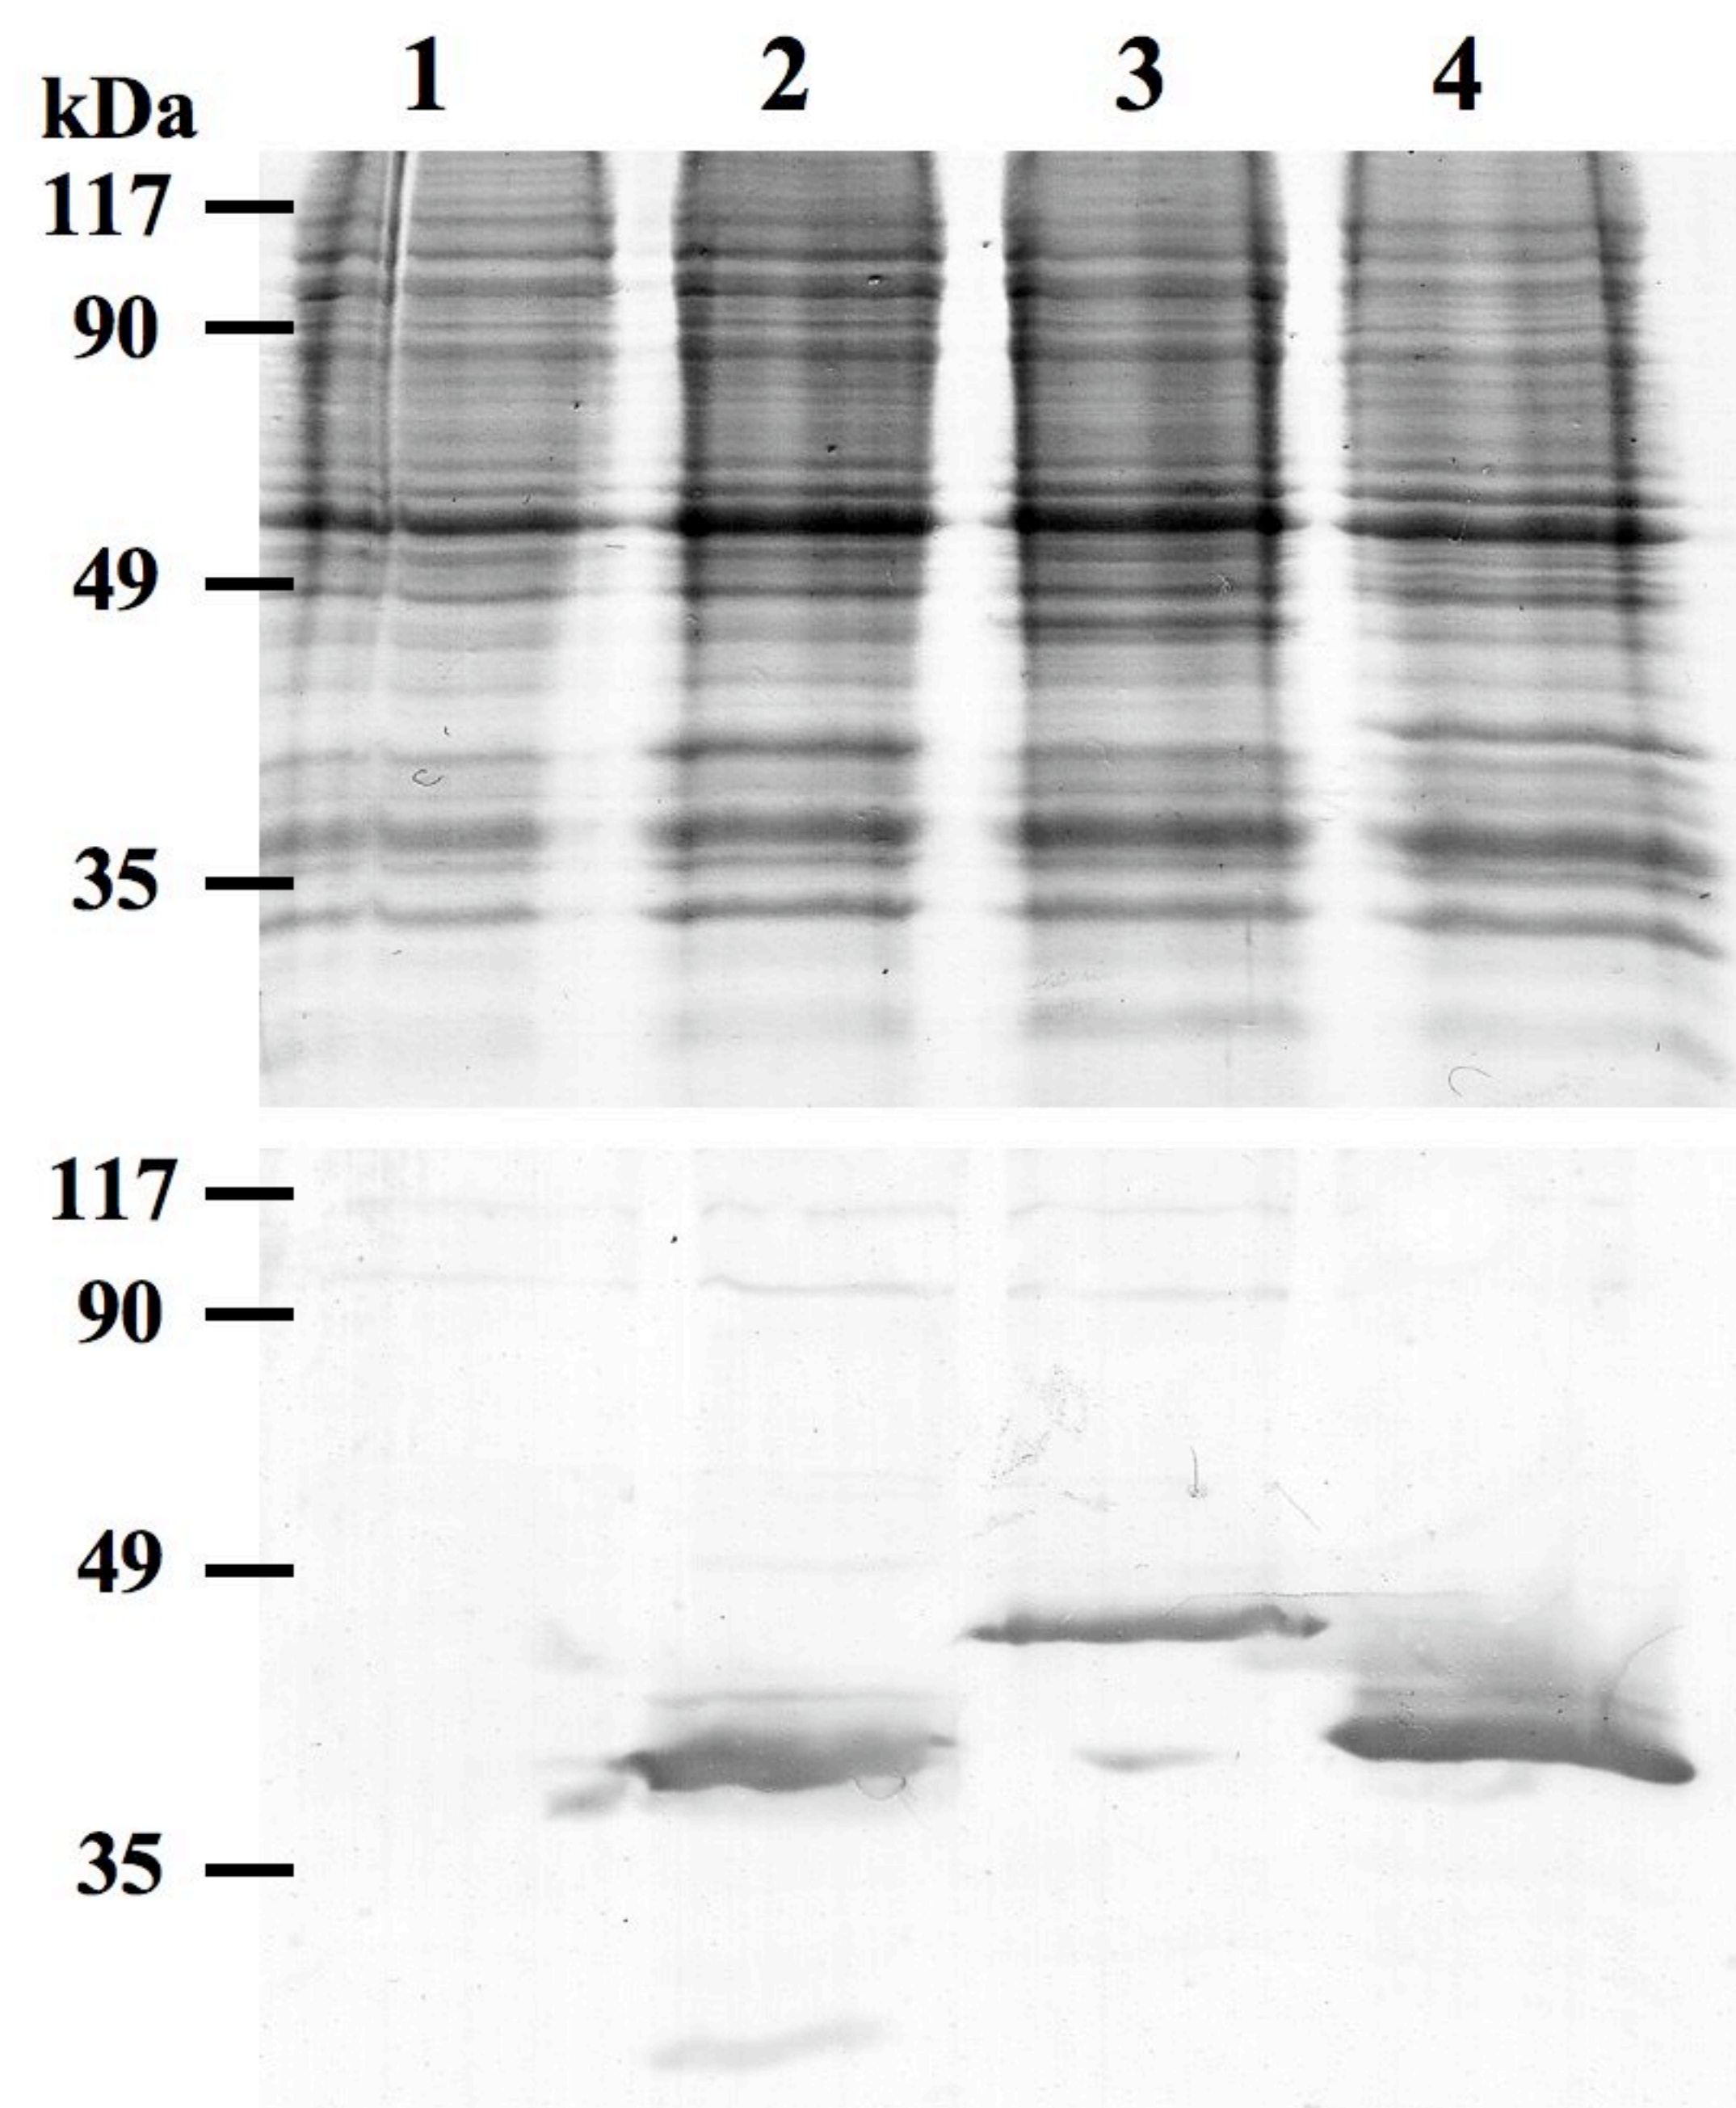

## Supplemental Figure S2

**Supplemental Figure S2: Expression of plastid phosphate transporter (pPT) homologues from *Galdieria sulphuraria* (*Gs*) in yeast.** **Upper panel:** Membrane proteins from galactose-induced *S. cerevisiae* cells transformed either with an unmodified expression vector (Lane 1) or with constructs for GsTPT (lane 2), GsPPT (lane 3) and GsGPT (lane 4) were separated by SDS-PAGE and stained with Coomassie Blue R250. **Lower panel:** Immunoblot analysis of an identical SDS-polyacrylamide-gel as described above. N-terminal poly-histidine tagged proteins were colorimetrically verified with anti-His antibody and anti-mouse-IgG antibody linked to an alkaline phosphatase. TPT, Triose-Phosphate-Translocator; GPT, Glucose-6-Phosphate-Translocator; PPT, Phosphoenolpyruvate-Translocator; kDa, kilo Dalton
