# Supplementary material
Source: PubMed Central journal article supplement (PMC2577237)
Supplement: pp.108.129478_3.pdf [file pp.108.129478_3.pdf]

**Supplemental Table S1:**

| <i>Primer</i> | <i>Sequence (5'–3')</i>           | <i>Direction</i> | <i>Purpose</i> |
|---------------|-----------------------------------|------------------|----------------|
| <b>GsTPT</b>  |                                   |                  |                |
| ML58          | TAGGATCCATGAACCTTCTAAAGAATCCATCA  | fwd              | HE             |
| ML59          | ATCTCGAGATGAACCCAGAGTCTACTTTATTT  | rev              | HE             |
| ML137         | AGCACTTGAACCCTTTGTCTG             | fwd              | RTPCR          |
| ML138         | TGCATTGGCAGGAGTGATAG              | rev              | RTPCR          |
| <b>GsPPT</b>  |                                   |                  |                |
| ML56          | TAGGATCCCAAGGAAACTCACTATTCGTC     | fwd              | HE             |
| ML66          | GTCTCGAGTCTATTCTATTTTCTCCTTCTTCTT | rev              | HE             |
|               | GG                                |                  |                |
| ML135         | CAACCATGGCTACCTTTTCGT             | fwd              | RTPCR          |
| ML136         | CGTCAAAAAGCCAATCCAAT              | red              | RTPCR          |
| <b>GsGPT</b>  |                                   |                  |                |
| ML94          | TGGTACCCAAAGGAGAAAAGGATATCATAAGAG | fwd              | HE             |
|               | C                                 |                  |                |
| ML95          | ATCTCGAGACTACTGCTTTTCTCGCTTCG     | rev              | HE             |
| ML133         | AGAGTGGTGGCTCTCCTCAA              | fwd              | RTPCR          |
| ML134         | GATGAATCCGGTCCAGGTAA              | rev              | RTPCR          |
| <b>GsActi</b> |                                   |                  |                |
| n             |                                   |                  |                |
| ML132         | CACAGCATCTGGCCAAACTT              | fwd              | RTPCR          |
| ML131         | GACCCACATTTGTTGGAAGG              | rev              | RTPCR          |

**Supplemental Table S2:**

|                                                            | <i>GsTPT</i>       | <i>GsPPT</i>             | <i>GsGPT</i>       |
|------------------------------------------------------------|--------------------|--------------------------|--------------------|
| <b>GenBank Accession Number</b>                            | EU853171           | EU853172                 | EU853173           |
| <b>Accession number Galdieria Genome Browser Build 3.0</b> | Stig_15<br>Gs21660 | Stig_53<br>Gs53050       | Stig_45<br>Gs48050 |
| <b>Amino acid statisitic report [%]</b>                    |                    |                          |                    |
| Identity to AtTPT                                          | 33                 | 30                       | 32                 |
| Similarity to AtTPT                                        | 53                 | 51                       | 53                 |
| Identity to AtPPT                                          | 31                 | 41                       | 31                 |
| Similarity to AtPPT                                        | 52                 | 57                       | 52                 |
| Identity to AtGPT                                          | 33                 | 33                       | 37                 |
| Similarity to AtGPT                                        | 56                 | 51                       | 55                 |
| <b>Exon/Intron Structure</b>                               |                    |                          |                    |
| # of Exons                                                 | 2                  | 4                        | 2                  |
| Exon length (nt)                                           | 119<br>1105        | 244<br>174<br>191<br>615 | 112<br>1121        |
| # of Introns                                               | 1                  | 3                        | 1                  |
| Intron length (nt)                                         | 53                 | 55<br>47<br>70           | 50                 |
| <b>Transmembrane spans (ConPred II)</b>                    | 9                  | 10                       | 9                  |
